# Supplementary material
Source: Springer Nature journal article supplement (https://www.springermedizin.de/resource/supplementary/12891_2014_2047_MOESM3_ESM.pdf/9510170)

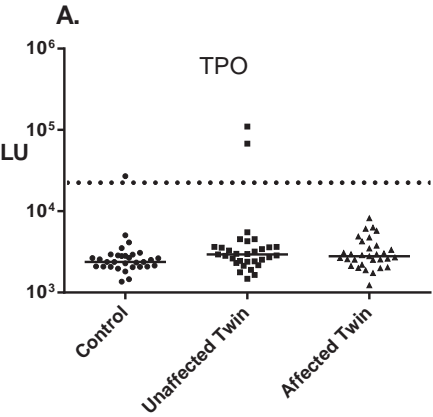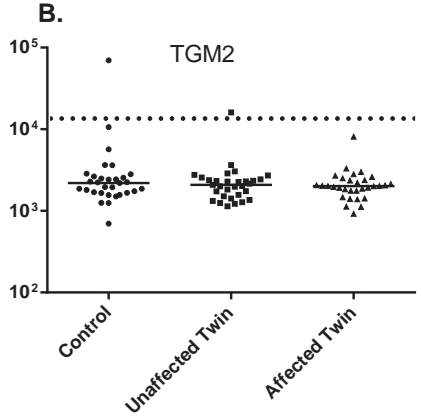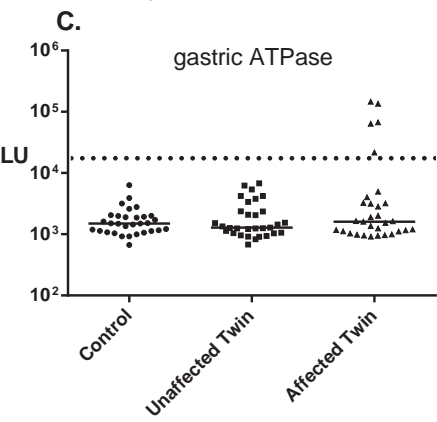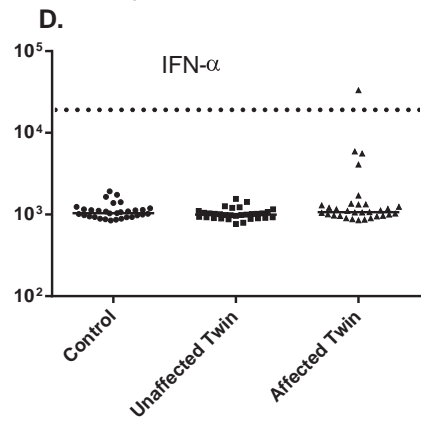

Supplement: MOESM3 [file 9510170]
